# Supplementary material for: De-Differentiation Confers Multidrug Resistance Via Noncanonical PERK-Nrf2 Signaling
Source: PLoS Biol. 2014 Sep 9;12(9):e1001945. doi: 10.1371/journal.pbio.1001945 (PMC4159113; doi:10.1371/journal.pbio.1001945)
Supplement: Table S5 — ROS-responsive genes pre-activated in HMLE-Twist cells. (XLSX) [file pbio.1001945.s005.xlsx]

## Sheet: Sheet1
ROS-Responsive Genes Pre-Activated in HMLE-Twist Cells
HMOX1
CXCR4
EGR1
ARRDC3
BHLHE40
CCL26
DDIT3
DNAJB4
ID2
HEY1
BAMBI
CREBRF
ARC
SRSF3
PNRC1
FAM102B
KCNJ2
CPEB2
RNA45S5
LOC344887
GEM
PPP1R3C
SPSB1
INSIG1
CITED2
FNIP1
ZNF891
DUSP1
GDF15
ADM
QKI
ZNF709
PCDH18
IP6K3
FAM43A
SEPT2
ZNF503
KLF4
EGR2
MMP1
PLEKHO2
CCSER2
JMY
MTBP
PI4K2A
EID3
HOXA5
ZNF852
TBC1D12
ZNF703
DIS3L2
EIF4G2
SNAI3-AS1
PSG4
*Bold = Nrf2 Target Genes
